# Supplementary material
Source: PubMed Central journal article supplement (PMC8774840)
Supplement: kiab486_supplementary_data.pdf [file kiab486_supplementary_data.pdf]

Supplemental Table S1. Positive selection analyses of UVR8 and RUP by branch-site model.

| Gene | Branch                          | Branch-site model | -lnL        | P-value     | Positively selected sites                                                                                                                                                                                                                                                                                                                                                                                                                                                                                                                                                                                                                                                                                                                                                                                                           |
|------|---------------------------------|-------------------|-------------|-------------|-------------------------------------------------------------------------------------------------------------------------------------------------------------------------------------------------------------------------------------------------------------------------------------------------------------------------------------------------------------------------------------------------------------------------------------------------------------------------------------------------------------------------------------------------------------------------------------------------------------------------------------------------------------------------------------------------------------------------------------------------------------------------------------------------------------------------------------|
| UVR8 | Ancestral branch of Chlorophyte | Null              | 68435.19453 |             |                                                                                                                                                                                                                                                                                                                                                                                                                                                                                                                                                                                                                                                                                                                                                                                                                                     |
|      |                                 | Alternative       | 68417.25078 | 0.000000002 | 125 A 0.999**, 130 S 0.980*, 273 H 0.976*, 320 I 0.976*, 325 S 0.987*, 327 C 1.000**, 343 W 1.000**, 379 M 0.992**, 387 S 0.973*, 398 G 0.990*, 409 L 0.989*, 441 T 0.989*, 625 T 0.961*, 723 G 0.951*, 864 R 0.977*                                                                                                                                                                                                                                                                                                                                                                                                                                                                                                                                                                                                                |
|      | Ancestral branch of land plants | Null              | 68446.03465 |             |                                                                                                                                                                                                                                                                                                                                                                                                                                                                                                                                                                                                                                                                                                                                                                                                                                     |
|      |                                 | Alternative       | 68446.03505 | 0.977435425 |                                                                                                                                                                                                                                                                                                                                                                                                                                                                                                                                                                                                                                                                                                                                                                                                                                     |
| RUP  | Ancestral branch of Chlorophyte | Null              | 74920.41872 |             | 890 E 0.983*, 914 T 0.983*, 963 S 0.961*, 966 T 0.982*, 967 G 0.987*, 969 I 0.993**, 974 S 0.996**, 983 I 0.975*, 985 R 0.983*, 986 K 0.988*, 1126 A 0.971*, 1127 C 0.964*, 1131 I 1.000**, 1132 C 0.984*, 1133 T 0.982*, 1135 A 0.988*, 1141 R 1.000**, 1174 G 0.997**, 1175 S 1.000**, 1184 E 0.987*, 1185 Y 0.998**, 1189 R 1.000**, 1193 T 0.963*, 1194 A 0.997**, 1196 F 0.999**, 1198 R 0.998**, 1216 Y 0.983*, 1245 C 0.996**, 1262 S 0.963*, 1281 S 0.999**, 1288 V 0.975*, 1289 E 0.973*, 1291 D 0.989*, 1295 G 0.999**, 1310 A 0.981*, 1348 T 0.986*, 1373 K 0.999**, 1417 - 0.953*, 1496 T 0.978*, 1513 R 0.995**, 1529 N 0.955*, 1530 E 0.970*, 1540 A 0.964*, 1549 W 0.997**, 1550 V 0.989*, 1675 S 0.975*, 1676 Q 0.983*, 1708 R 0.986*, 1713 C 0.999**, 1714 M 0.998**, 1720 G 0.985*, 1726 Q 0.955*, 1730 G 0.986*, |
|      |                                 | Alternative       | 76569.64212 | 0           |                                                                                                                                                                                                                                                                                                                                                                                                                                                                                                                                                                                                                                                                                                                                                                                                                                     |

Note: The number for amino acid residues identified by Bayes empirical bayes (BEB) analyses corresponds to their alignment positions. The posterior probability (PP) under BEB analyses is behind hyphen.

Supplemental Table S2. The information of plant genomes used in this study.

| Phylum      | Class              | Order                 | Family             | Species                          | Link                                                                                              |                                                                                                   |                                                                                                   |
|-------------|--------------------|-----------------------|--------------------|----------------------------------|---------------------------------------------------------------------------------------------------|---------------------------------------------------------------------------------------------------|---------------------------------------------------------------------------------------------------|
| Rhodophyta  | Cyanidiophyceae    | Cyanidiales           | Cyanidiaceae       | <i>Cyanidioschyzon merolae</i>   | <a href="https://www.ncbi.nlm.nih.gov/genome/79">https://www.ncbi.nlm.nih.gov/genome/79</a>       |                                                                                                   |                                                                                                   |
|             |                    |                       |                    | <i>Galdieria sulphuraria</i>     | <a href="https://www.ncbi.nlm.nih.gov/genome/405">https://www.ncbi.nlm.nih.gov/genome/405</a>     |                                                                                                   |                                                                                                   |
|             | Florideophyceae    | Gigartinales          | Gigartinaceae      | <i>Chondrus crispus</i>          | <a href="https://www.ncbi.nlm.nih.gov/genome/12016">https://www.ncbi.nlm.nih.gov/genome/12016</a> |                                                                                                   |                                                                                                   |
|             | Bangiophyceae      | Bangiales             | Bangiaceae         | <i>Porphyra umbilicalis</i>      | <a href="https://www.ncbi.nlm.nih.gov/genome/12861">https://www.ncbi.nlm.nih.gov/genome/12861</a> |                                                                                                   |                                                                                                   |
| Glaucophyta | Glaucozystophyceae | Glaucozystales        | Cyanophoraceae     | <i>Cyanophora paradoxa</i>       | <a href="https://www.ncbi.nlm.nih.gov/genome/303">https://www.ncbi.nlm.nih.gov/genome/303</a>     |                                                                                                   |                                                                                                   |
| Chlorophyta | Mamiellophyceae    | Mamiellales           | Bathycoccaceae     | <i>Ostreococcus lucimarinus</i>  | <a href="https://www.ncbi.nlm.nih.gov/genome/373">https://www.ncbi.nlm.nih.gov/genome/373</a>     |                                                                                                   |                                                                                                   |
|             |                    |                       |                    | <i>Bathycoccus prasinos</i>      | <a href="https://www.ncbi.nlm.nih.gov/genome/12309">https://www.ncbi.nlm.nih.gov/genome/12309</a> |                                                                                                   |                                                                                                   |
|             |                    |                       |                    | Mamiellaceae                     | <i>Micromonas pusilla</i>                                                                         | <a href="https://www.ncbi.nlm.nih.gov/genome/501">https://www.ncbi.nlm.nih.gov/genome/501</a>     |                                                                                                   |
|             | Trebouxiophyceae   | T.ordo incertae sedis | Coccomyxaceae      | <i>Coccomyxa subellipsoidea</i>  | <a href="https://www.ncbi.nlm.nih.gov/genome/2692">https://www.ncbi.nlm.nih.gov/genome/2692</a>   |                                                                                                   |                                                                                                   |
|             |                    |                       |                    | Chlorellales                     | Chlorellaceae                                                                                     | <i>Chlorella variabilis</i>                                                                       | <a href="https://www.ncbi.nlm.nih.gov/genome/694">https://www.ncbi.nlm.nih.gov/genome/694</a>     |
|             |                    |                       |                    |                                  |                                                                                                   | <i>Auxenochlorella protothecoides</i>                                                             | <a href="http://plantregmap.cbi.pku.edu.cn/">http://plantregmap.cbi.pku.edu.cn/</a>               |
|             | Ulvophyceae        | Ulvales               | Ulvaceae           | <i>Ulva mutabilis</i>            | <a href="https://www.ncbi.nlm.nih.gov/genome/72458">https://www.ncbi.nlm.nih.gov/genome/72458</a> |                                                                                                   |                                                                                                   |
|             | Chlorophyceae      | Chlamydomonadales     | Chlamydomonadaceae | <i>Chlamydomonas reinhardtii</i> | <a href="https://phytozome.jgi.doe.gov/">https://phytozome.jgi.doe.gov/</a>                       |                                                                                                   |                                                                                                   |
|             |                    |                       |                    | Dunaliellaceae                   | <i>Dunaliella salina</i>                                                                          | <a href="http://plantregmap.cbi.pku.edu.cn/">http://plantregmap.cbi.pku.edu.cn/</a>               |                                                                                                   |
|             |                    |                       |                    | Volvoxaceae                      | <i>Volvox carteri</i>                                                                             | <a href="http://plantregmap.cbi.pku.edu.cn/">http://plantregmap.cbi.pku.edu.cn/</a>               |                                                                                                   |
|             |                    |                       |                    |                                  | <i>Gonium pectorale</i>                                                                           | <a href="https://www.ncbi.nlm.nih.gov/genome/16856">https://www.ncbi.nlm.nih.gov/genome/16856</a> |                                                                                                   |
|             |                    |                       |                    | Sphaeropleales                   | Selenastraceae                                                                                    | <i>Monoraphidium neglectum</i>                                                                    | <a href="https://www.ncbi.nlm.nih.gov/genome/36372">https://www.ncbi.nlm.nih.gov/genome/36372</a> |

|                |                     |                 |                  |                                   |                                                                                                                                         |
|----------------|---------------------|-----------------|------------------|-----------------------------------|-----------------------------------------------------------------------------------------------------------------------------------------|
| Streptophyta   | Mesostigmatophyceae | Mesostigmatales | Mesostigmataceae | <i>Mesostigma viride</i>          | <a href="https://www.ncbi.nlm.nih.gov/geo/query/acc.cgi?acc=GSE123852">https://www.ncbi.nlm.nih.gov/geo/query/acc.cgi?acc=GSE123852</a> |
|                | Klebsormidiophyceae | Klebsormidiales | Klebsormidiaceae | <i>Klebsormidium nitens</i>       | <a href="https://www.ncbi.nlm.nih.gov/genome?term=Klebsormidium">https://www.ncbi.nlm.nih.gov/genome?term=Klebsormidium</a>             |
|                | Charophyceae        | Charales        | Characeae        | <i>Chara braunii</i>              | <a href="https://bioinformatics.psb.ugent.be/orcae/">https://bioinformatics.psb.ugent.be/orcae/</a>                                     |
|                | Zygnematophyceae    | Zygnematales    | Mesotaeniaceae   | <i>Mesotaenium endlicherianum</i> | <a href="https://www.ncbi.nlm.nih.gov/genome/33366">https://www.ncbi.nlm.nih.gov/genome/33366</a>                                       |
|                |                     | Spirogloales    | Spirogloaceae    | <i>Spirogloea muscicola</i>       | <a href="https://www.ncbi.nlm.nih.gov/genome/86225">https://www.ncbi.nlm.nih.gov/genome/86225</a>                                       |
| Bryophyta      | Marchantiopsida     | Marchantiales   | Marchantiaceae   | <i>Marchantia polymorpha</i>      | <a href="https://www.ncbi.nlm.nih.gov/genome/3220">https://www.ncbi.nlm.nih.gov/genome/3220</a>                                         |
|                | Bryopsida           | Funariales      | Funariaceae      | <i>Physcomitrium patens</i>       | <a href="https://www.ncbi.nlm.nih.gov/genome/383">https://www.ncbi.nlm.nih.gov/genome/383</a>                                           |
|                | Sphagnopsida        | Sphagnales      | Sphagnaceae      | <i>Sphagnum fallax</i>            | <a href="https://phytozome.jgi.doe.gov/">https://phytozome.jgi.doe.gov/</a>                                                             |
| Lycopodiophyta | Lycopodiopsida      | Selaginellales  | Selaginellaceae  | <i>Selaginella moellendorffii</i> | <a href="https://www.ncbi.nlm.nih.gov/genome/411">https://www.ncbi.nlm.nih.gov/genome/411</a>                                           |
| Polypodiophyta | Polypodiopsida      | Salviniales     | Salviniaceae     | <i>Azolla filiculoides</i>        | <a href="https://www.fernbase.org/">https://www.fernbase.org/</a>                                                                       |
|                |                     |                 |                  | <i>Salvinia cucullata</i>         | <a href="https://www.fernbase.org/">https://www.fernbase.org/</a>                                                                       |
| Gymnospermae   | Pinopsida           | Pinales         | Pinaceae         | <i>Picea abies</i>                | <a href="https://www.ncbi.nlm.nih.gov/genome/11155">https://www.ncbi.nlm.nih.gov/genome/11155</a>                                       |
|                | Ginkgoopsida        | Ginkgoales      | Ginkgoaceae      | <i>Ginkgo biloba</i>              | <a href="http://gigadb.org/dataset/100209">http://gigadb.org/dataset/100209</a>                                                         |
|                | Gnetopsida          | Gnetales        | Gnetaceae        | <i>Gnetum montanum</i>            | <a href="https://datadryad.org/resource/doi:10.5061/dryad.0vm37.2">https://datadryad.org/resource/doi:10.5061/dryad.0vm37.2</a>         |
| Angiospermae   | basal Angiosperms   | Amborellales    | Amborellaceae    | <i>Amborella trichopoda</i>       | <a href="http://www.angiosperms.org/">http://www.angiosperms.org/</a>                                                                   |
|                |                     | Nymphaeales     | Nymphaeaceae     | <i>Nymphaea colorata</i>          | <a href="http://www.angiosperms.org/">http://www.angiosperms.org/</a>                                                                   |
|                | Magnoliidae         | Magnoliales     | Magnoliaceae     | <i>Liriodendron chinense</i>      | <a href="http://www.angiosperms.org/">http://www.angiosperms.org/</a>                                                                   |
|                |                     | Laurales        | Calycanthaceae   | <i>Cinnamomum salicifollus</i>    | <a href="http://www.angiosperms.org/">http://www.angiosperms.org/</a>                                                                   |
|                | Monocotyledoneae    | Alismatales     | Araceae          | <i>Spirodela polyrhiza</i>        | <a href="http://www.angiosperms.org/">http://www.angiosperms.org/</a>                                                                   |
|                |                     |                 | Zosteraceae      | <i>Zostera marina</i>             | <a href="http://www.angiosperms.org/">http://www.angiosperms.org/</a>                                                                   |
|                |                     |                 | Poales           | Poaceae                           | <i>Brachypodium distachyon</i>                                                                                                          |

|                  |                |               |                                                                           |                                                                       |
|------------------|----------------|---------------|---------------------------------------------------------------------------|-----------------------------------------------------------------------|
|                  |                |               | <i>Oryza sativa</i>                                                       | <a href="http://www.angiosperms.org/">http://www.angiosperms.org/</a> |
|                  |                |               | <i>Setaria italica</i>                                                    | <a href="http://www.angiosperms.org/">http://www.angiosperms.org/</a> |
|                  |                |               | <i>Zea mays</i>                                                           | <a href="http://www.angiosperms.org/">http://www.angiosperms.org/</a> |
|                  |                | Bromeliaceae  | <i>Ananas comosus</i>                                                     | <a href="http://www.angiosperms.org/">http://www.angiosperms.org/</a> |
|                  | Arecales       | Arecaceae     | <i>Phoenix dactylifera</i>                                                | <a href="http://www.angiosperms.org/">http://www.angiosperms.org/</a> |
|                  | Zingiberales   | Musaceae      | <i>Musa acuminata</i>                                                     | <a href="http://www.angiosperms.org/">http://www.angiosperms.org/</a> |
|                  | Asparagales    | Asparagaceae  | <i>Asparagus officinalis</i>                                              | <a href="http://www.angiosperms.org/">http://www.angiosperms.org/</a> |
| Eudicotyledoneae | Proteales      | Nelumbonaceae | <i>Nelumbo nucifera</i>                                                   | <a href="http://www.angiosperms.org/">http://www.angiosperms.org/</a> |
|                  | Ranunculales   | Ranunculaceae | <i>Aquilegia coerulea</i>                                                 | <a href="http://www.angiosperms.org/">http://www.angiosperms.org/</a> |
|                  | Caryophyllales | Amaranthaceae | <i>Amaranthus</i><br><i>hypochondriacus</i>                               | <a href="http://www.angiosperms.org/">http://www.angiosperms.org/</a> |
|                  |                |               | <i>Chenopodium quinoa</i>                                                 | <a href="http://www.angiosperms.org/">http://www.angiosperms.org/</a> |
|                  | Lamiales       | Phrymaceae    | <i>Mimulus guttatus</i>                                                   | <a href="http://www.angiosperms.org/">http://www.angiosperms.org/</a> |
|                  |                | Oleaceae      | <i>Olea europaea</i>                                                      | <a href="http://www.angiosperms.org/">http://www.angiosperms.org/</a> |
|                  | Solanales      | Solanaceae    | <i>Solanum lycopersicum</i>                                               | <a href="http://www.angiosperms.org/">http://www.angiosperms.org/</a> |
|                  | Gentianales    | Rubiaceae     | <i>Coffea canephora</i>                                                   | <a href="http://www.angiosperms.org/">http://www.angiosperms.org/</a> |
| Eudicotyledoneae | Asterales      | Asteraceae    | <i>Helianthus annuus</i><br><i>Lactuca sativa</i>                         | <a href="http://www.angiosperms.org/">http://www.angiosperms.org/</a> |
|                  | Apiales        | Apiaceae      | <i>Daucus carota</i>                                                      | <a href="http://www.angiosperms.org/">http://www.angiosperms.org/</a> |
|                  | Saxifragales   | Crassulaceae  | <i>Kalanchoe</i><br><i>fedtschenkoi</i>                                   | <a href="http://www.angiosperms.org/">http://www.angiosperms.org/</a> |
|                  | Vitales        | Vitaceae      | <i>Vitis vinifera</i>                                                     | <a href="http://www.angiosperms.org/">http://www.angiosperms.org/</a> |
|                  | Cucurbitales   | Cucurbitaceae | <i>Cucumis sativus</i>                                                    | <a href="http://www.angiosperms.org/">http://www.angiosperms.org/</a> |
|                  | Fabales        | Fabaceae      | <i>Cicer arietinum</i><br><i>Glycine max</i><br><i>Phaseolus vulgaris</i> | <a href="http://www.angiosperms.org/">http://www.angiosperms.org/</a> |

|                  |              |               |                               |                                                                       |
|------------------|--------------|---------------|-------------------------------|-----------------------------------------------------------------------|
|                  |              |               | <i>Vigna unguiculata</i>      | <a href="http://www.angiosperms.org/">http://www.angiosperms.org/</a> |
|                  | Malpighiales | Linaceae      | <i>Linum usitatissimum</i>    | <a href="http://www.angiosperms.org/">http://www.angiosperms.org/</a> |
|                  |              | Salicaceae    | <i>Populus deltoides</i>      | <a href="http://www.angiosperms.org/">http://www.angiosperms.org/</a> |
|                  |              | Euphorbiaceae | <i>Manihot esculenta</i>      | <a href="http://www.angiosperms.org/">http://www.angiosperms.org/</a> |
|                  |              |               | <i>Ricinus communis</i>       | <a href="http://www.angiosperms.org/">http://www.angiosperms.org/</a> |
|                  | Brassicales  | Caricaceae    | <i>Carica papaya</i>          | <a href="http://www.angiosperms.org/">http://www.angiosperms.org/</a> |
|                  |              | Brassicaceae  | <i>Arabidopsis thaliana</i>   | <a href="http://www.angiosperms.org/">http://www.angiosperms.org/</a> |
|                  |              |               | <i>Brassica rapa</i>          | <a href="http://www.angiosperms.org/">http://www.angiosperms.org/</a> |
|                  |              |               | <i>Eutrema salsugineum</i>    | <a href="http://www.angiosperms.org/">http://www.angiosperms.org/</a> |
|                  | Rosales      | Rosaceae      | <i>Fragaria vesca</i>         | <a href="http://www.angiosperms.org/">http://www.angiosperms.org/</a> |
|                  |              |               | <i>Malus domestica</i>        | <a href="http://www.angiosperms.org/">http://www.angiosperms.org/</a> |
| Eudicotyledoneae | Rosales      | Rosaceae      | <i>Prunus persica</i>         | <a href="http://www.angiosperms.org/">http://www.angiosperms.org/</a> |
|                  | Malvales     | Malvaceae     | <i>Gossypium raimondii</i>    | <a href="http://www.angiosperms.org/">http://www.angiosperms.org/</a> |
|                  |              |               | <i>Theobroma cacao</i>        | <a href="http://www.angiosperms.org/">http://www.angiosperms.org/</a> |
|                  | Myrtales     | Myrtaceae     | <i>Eucalyptus grandis</i>     | <a href="http://www.angiosperms.org/">http://www.angiosperms.org/</a> |
|                  | Sapindales   | Rutaceae      | <i>Citrus clementina</i>      | <a href="http://www.angiosperms.org/">http://www.angiosperms.org/</a> |
|                  |              | Anacardiaceae | <i>Anacardium occidentale</i> | <a href="http://www.angiosperms.org/">http://www.angiosperms.org/</a> |

---

Supplemental Table S3. The information of queries in the similarity searches.

| <b>Transcription factors</b> | <b>BLASTP query<br/>(<i>Arabidopsis thaliana</i>)</b>                    | <b>Functional domain</b> |
|------------------------------|--------------------------------------------------------------------------|--------------------------|
| BES1                         | AT1G19350                                                                | BES1_N domain            |
| BIM1                         | AT5G08130                                                                | HLH domain               |
| WRKY36                       | AT1G69810                                                                | WRKY domain              |
| MYB73/MYB77                  | MYB73: AT4G37260<br>MYB77: AT3G50060                                     | MYB domain               |
| MYB13                        | AT1G06180                                                                | MYB domain               |
| PIFs                         | PIF1: AT2G20180<br>PIF3: AT1G09530<br>PIF4: AT2G43010<br>PIF5: AT3G59060 | bHLH domain              |
| HY5/HYH                      | HY5: AT5G11260<br>HYH: AT3G17609                                         | bZIP domain              |

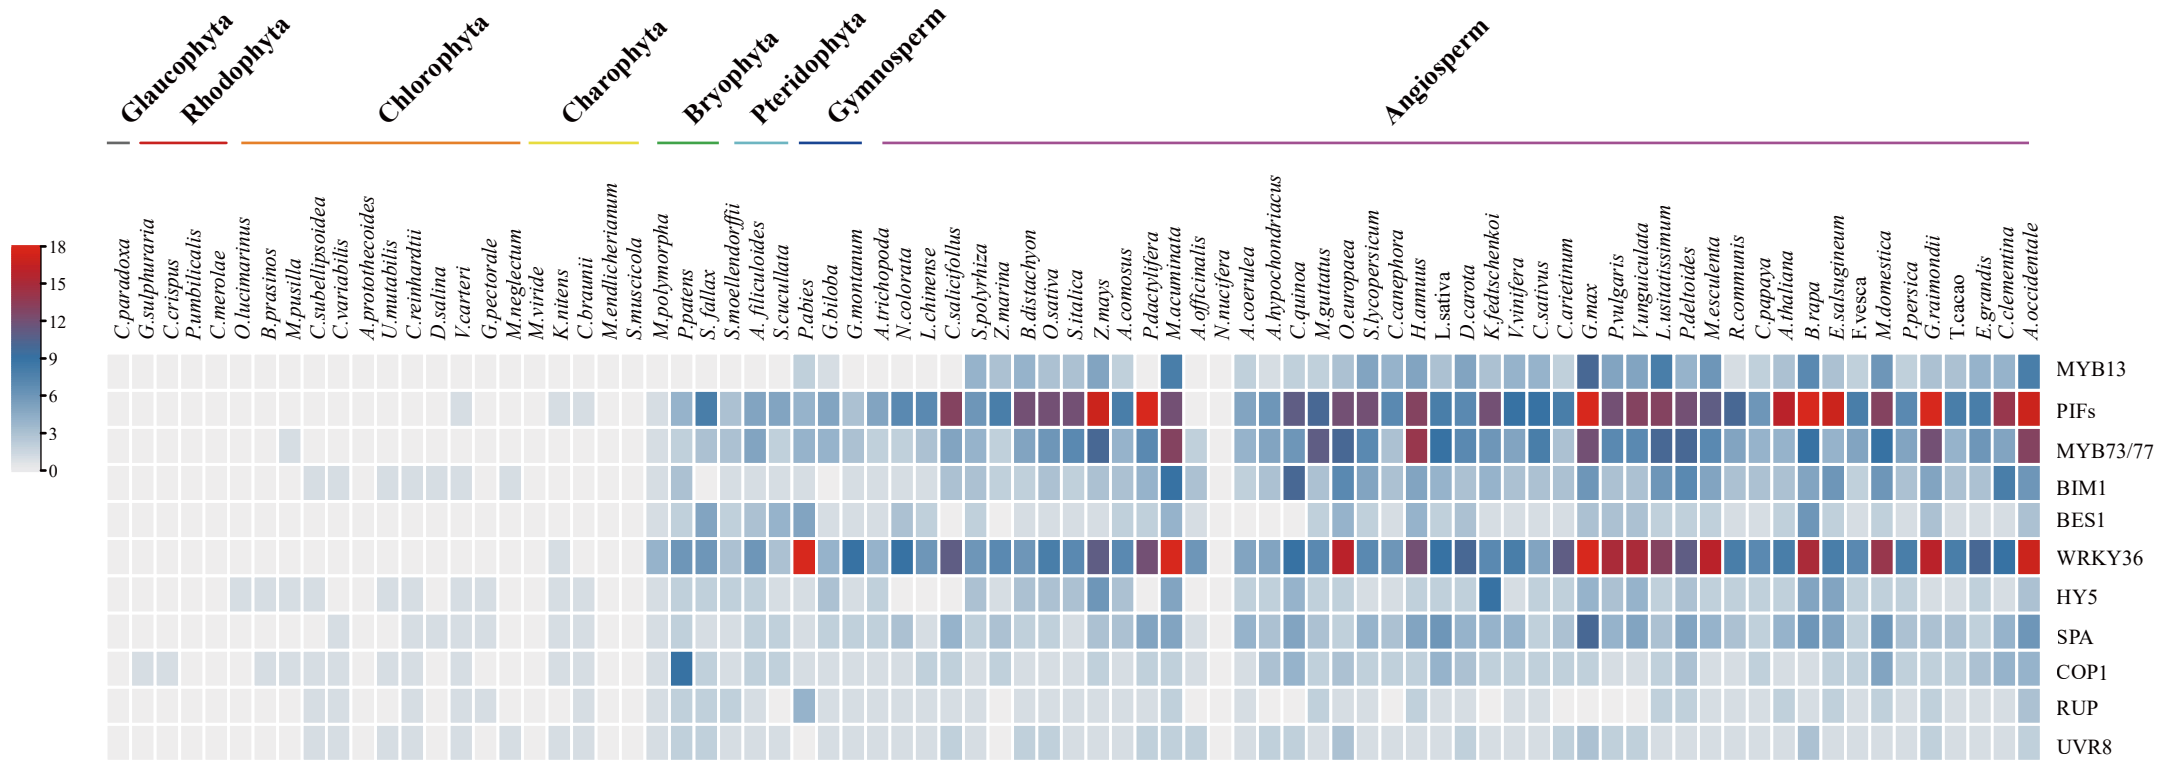

Supplemental Figure S1. Heat map of orthologs numbers of UVR8-mediated signaling pathway in Archaeplastida.

## C27 Region

|                                           | 390     | 400                           |                               |
|-------------------------------------------|---------|-------------------------------|-------------------------------|
| <i>A. trichopoda</i> _00017.257           | I E S S | S . A E P F S G K . . . V A . | V L P S . . . . . D . . . . . |
| <i>A. thaliana</i> _AT5G63860.1           | I E S S | N . I D P S S G K . . . S W . | V S P A . . . . . E . . . . . |
| <i>Z. mays</i> _30969448                  | L E S S | T . A A P F A A K . . . V W . | V S P S . . . . . E . . . . . |
| <i>G. biloba</i> _14008                   | I E T S | K . T T S L S G A . . . N W . | I S P S . . . . . E . . . . . |
| <i>G. Blume</i> _TnS000558519t02          | V Q T S | N . K K L Q S G T . . . A W . | V S P A . . . . . E . . . . . |
| <i>A. filiculoides</i> _s0509.g074711     | I E S S | T Y S S I R P G T . . A N W . | I A P C . . . . . E . . . . . |
| <i>S. cucullata</i> _s0112.g020798        | V G S S | V . S S A S P V A . . S N W . | I A P S . . . . . E . . . . . |
| <i>S. moellendorffii</i> _438355          | L E K S | P . E P A V T G S G V A N W . | I S P S . . . . . E . . . . . |
| <i>P. patens</i> _Pp3c10_2230V3.2         | I E S S | G . S S N C T T S . . . N W . | I S P A . . . . . E . . . . . |
| <i>P. patens</i> _Pp3c3_15300V3.4         | I E S S | P . S G N C A S S . . . N W . | I S P A . . . . . E . . . . . |
| <i>M. polymorpha</i> _Mapoly0023s0125.2   | L E S S | R . T T T S T G S . . . H W . | I S P S . . . . . E . . . . . |
| <i>M. endlicherianum</i> _ME000204S03010  | F . . . | . . . . . S L .               | I F P L . . . . . E . . . . . |
| <i>S. muscicola</i> _SM000080S22914       | I E R P | V . . . . . S N G .           | S G P S L R L L P H . . . . . |
| <i>S. muscicola</i> _SM000048S16505       | I E R P | V . . . . . S N G .           | S G P S L R L L P H . . . . . |
| <i>S. muscicola</i> _SM000049S16745       | I E R P | V . . . . . S N G .           | S G P S L R L L P H . . . . . |
| <i>C. braunii</i> _g41650                 | I G K S | N . H S R I G G A . . A P W . | I A P S . . . . . E . . . . . |
| <i>K. nitens</i> _kf100419_0050           | L A F S | K . . . . F N A D . A A L .   | A T P A . . . . . E . . . . . |
| <i>M. viride</i> _Mv08436                 | L Q A M | A . . . . Q G G V T M M A T . | K G T A D G D A D . . . . .   |
| <i>C. variabilis</i> _XP_005847046.1      | I T R Q | A . . . . . Q P V V L Y G     | V A P S . . . . . D . . . . . |
| <i>V. carteri</i> _Vocar.0017s0213.1      | I L A T | A . G E D M G G A G M F A Y . | V A P A . . . . . D . . . . . |
| <i>C. reinhardtii</i> _Cre05.g230600.t1.1 | I L A T | A . M A H D G G E G G L . Y . | V A P A . . . . . D . . . . . |

## C17 Region

|                                           | 410             | 420                                             | 430                                       |                             |
|-------------------------------------------|-----------------|-------------------------------------------------|-------------------------------------------|-----------------------------|
| <i>A. trichopoda</i> _00017.257           | . R Y A V V P   | D E T A . . . . . Q G Q P                       | P A T G R . . . . . S G G N               | D A S V P D N . . . .       |
| <i>A. thaliana</i> _AT5G63860.1           | . R Y A V V P   | D E T . . . . . G L T D G S S K                 | . . . . . G N G G                         | D I S V P Q T . . . .       |
| <i>Z. mays</i> _30969448                  | . R Y A I V P   | D E N V . . . . . R K A G                       | G T A R . . . . . G N G A                 | D A N V P E N . . . .       |
| <i>G. biloba</i> _14008                   | . R Y A V V P   | D E T Q V T . . . . . G Q L S V V               | P . . . . . K . . . . . N S S G           | D A S V P D T . . . .       |
| <i>G. Blume</i> _TnS000558519t02          | . R Y A V V P   | D E . . . . . A G V                             | P . . . . . D . . . . . N . . . . .       | E A S V P Q A . . . .       |
| <i>A. filiculoides</i> _s0509.g074711     | . R Y A V V P   | D E T V K T L A S R L H Q T T S V . .           | C W Q . . . . .                           | . . . . .                   |
| <i>S. cucullata</i> _s0112.g020798        | . R Y A V V P   | D E T V K T L A N R L H Q T A S V . .           | G N Q V P . . . . .                       | Q A S D A S V P D T . . . . |
| <i>S. moellendorffii</i> _438355          | . R Y A V V P   | D E A V L . . . . .                             | V . . . . . G Q M G                       | D A S V P D T . . . .       |
| <i>P. patens</i> _Pp3c10_2230V3.2         | . R Y A V V P   | D E T L G P L A R R L H Q T T N F E G E E L E V | P T A S D . . . . . D S S G               | D A N V P D T . . . .       |
| <i>P. patens</i> _Pp3c3_15300V3.4         | . R Y A V V P   | D E T I G P L T N R L H Q T N Y M D G .         | E L L V P N A V L . . . . . G S S R       | D A S V P D S . . . .       |
| <i>M. polymorpha</i> _Mapoly0023s0125.2   | . R Y A V V P   | V E T V G . . . . . D N E V                     | P . . . . .                               | S S D A S V P D T . . . .   |
| <i>M. endlicherianum</i> _ME000204S03010  | . . . S V V V S | Q G V R M . . . . .                             | . . . . . D A N . . . . . D A L A         | D A S V P D A . . . .       |
| <i>S. muscicola</i> _SM000080S22914       | . R D A V V P   | G E P M V E T M A . . . . . A E P M             | P . . . . .                               | A S D A S V P N A . . . .   |
| <i>S. muscicola</i> _SM000048S16505       | . R D A V V P   | G E P M V E T M A . . . . . A E P L             | P . . . . .                               | A S D A S V P N A . . . .   |
| <i>S. muscicola</i> _SM000049S16745       | . R D A V V P   | G E T M V E T M A . . . . . A E P L             | P . . . . .                               | A S D A S V P N A . . . .   |
| <i>C. braunii</i> _g41650                 | . R Y A V V P   | D E S V D Q V L L . . . . .                     | . . . . . S S . . . . . I C G T Y G T V P | E S . . . . .               |
| <i>K. nitens</i> _kf100419_0050           | . R Y A I V P   | E R P P V A F N H . . . . . G G D T             | P A C Q G . . . . . D C A A               | D V P V A . . . . .         |
| <i>M. viride</i> _Mv08436                 | . D S A V V P   | . . . . . T W G A A V                           | P . . . . . F S E G S                     | G L E V P V L . . . . .     |
| <i>C. variabilis</i> _XP_005847046.1      | . R Y A V V P   | D S . . . . . A                                 | P G A D E . . . . .                       | . . . . . V P S V . . . . . |
| <i>V. carteri</i> _Vocar.0017s0213.1      | . N R Y A V V   | . . . . .                                       | P G A D D P Y G N G S . .                 | T A V G A V P S M T V L D   |
| <i>C. reinhardtii</i> _Cre05.g230600.t1.1 | . R Y A V V     | . . . . .                                       | P G A D E P Y G N G A G G S S             | V A A V P S M . . . . .     |

|                                           |                                                                             |                                         |
|-------------------------------------------|-----------------------------------------------------------------------------|-----------------------------------------|
| <i>A. trichopoda</i> _00017.257           | . . . . .                                                                   | D . . . . V K R V R I . . . . .         |
| <i>A. thaliana</i> _AT5G63860.1           | . . . . .                                                                   | D . . . . V K R V R I . . . . .         |
| <i>Z. mays</i> _30969448                  | . . . . .                                                                   | D . . . . V K R M R V Q S S . . . . .   |
| <i>G. biloba</i> _14008                   | . . . . .                                                                   | D . . . . V K R M R N . . . . .         |
| <i>G. Blume</i> _TnS000558519t02          | . . . . .                                                                   | D . . . . M K R V R S G R . . . . .     |
| <i>A. filiculoides</i> _s0509.g074711     | . . . . .                                                                   | . . . . . K Q F I . . . . .             |
| <i>S. cucullata</i> _s0112.g020798        | . . . . .                                                                   | D . . . . F K R L R T A . . . . .       |
| <i>S. moellendorffii</i> _438355          | . . . . .                                                                   | D . . . . I K R I R T D . . . . .       |
| <i>P. patens</i> _Pp3c10_2230V3.2         | . . . . .                                                                   | D . . . . T K R M R T T L . . . . .     |
| <i>P. patens</i> _Pp3c3_15300V3.4         | . . . . .                                                                   | D K . . . T K R L R T A L . . . . .     |
| <i>M. polymorpha</i> _Mapoly0023s0125.2   | . . . . .                                                                   | D . . . . V K R L R T G F . . . . .     |
| <i>M. endlicherianum</i> _ME000204S03010  | . . . . .                                                                   | D . . . . T K R Q R K L . . . . .       |
| <i>S. muscicola</i> _SM000080S22914       | . . . . .                                                                   | D S . . . Q K R V R V A . . . . .       |
| <i>S. muscicola</i> _SM000048S16505       | . . . . .                                                                   | D S . . . Q K R V R V A . . . . .       |
| <i>S. muscicola</i> _SM000049S16745       | . . . . .                                                                   | D S . . . Q K R V R V A . . . . .       |
| <i>C. braunii</i> _g41650                 | . . . . .                                                                   | D . . . . V K R Q K T V . . . . .       |
| <i>K. nitens</i> _kf100419_0050           | . . . . .                                                                   | . . . . . A K R P K I H . . . . .       |
| <i>M. viride</i> _Mv08436                 | . . . . .                                                                   | . . . . . P K R A R H D . . . . .       |
| <i>C. variabilis</i> _XP_005847046.1      | . . . . . P E A A T V P Q A G A V P                                         | . . . . . D S . . . K R Q K V . . . . . |
| <i>V. carteri</i> _Vocar.0017s0213.1      | V I G A A A P F V Q A P Q G P L W G V S S A E E G A A V R G E A N T P G G E | D S R L P K R A R V S A E P C           |
| <i>C. reinhardtii</i> _Cre05.g230600.t1.1 | . . . . . G P . . . . . D D M G T A G .                                     | D S R D H K K A R T G G D M .           |

Supplemental Figure S2. The alignments of the C terminus of UVR8 proteins in representative green plants species.





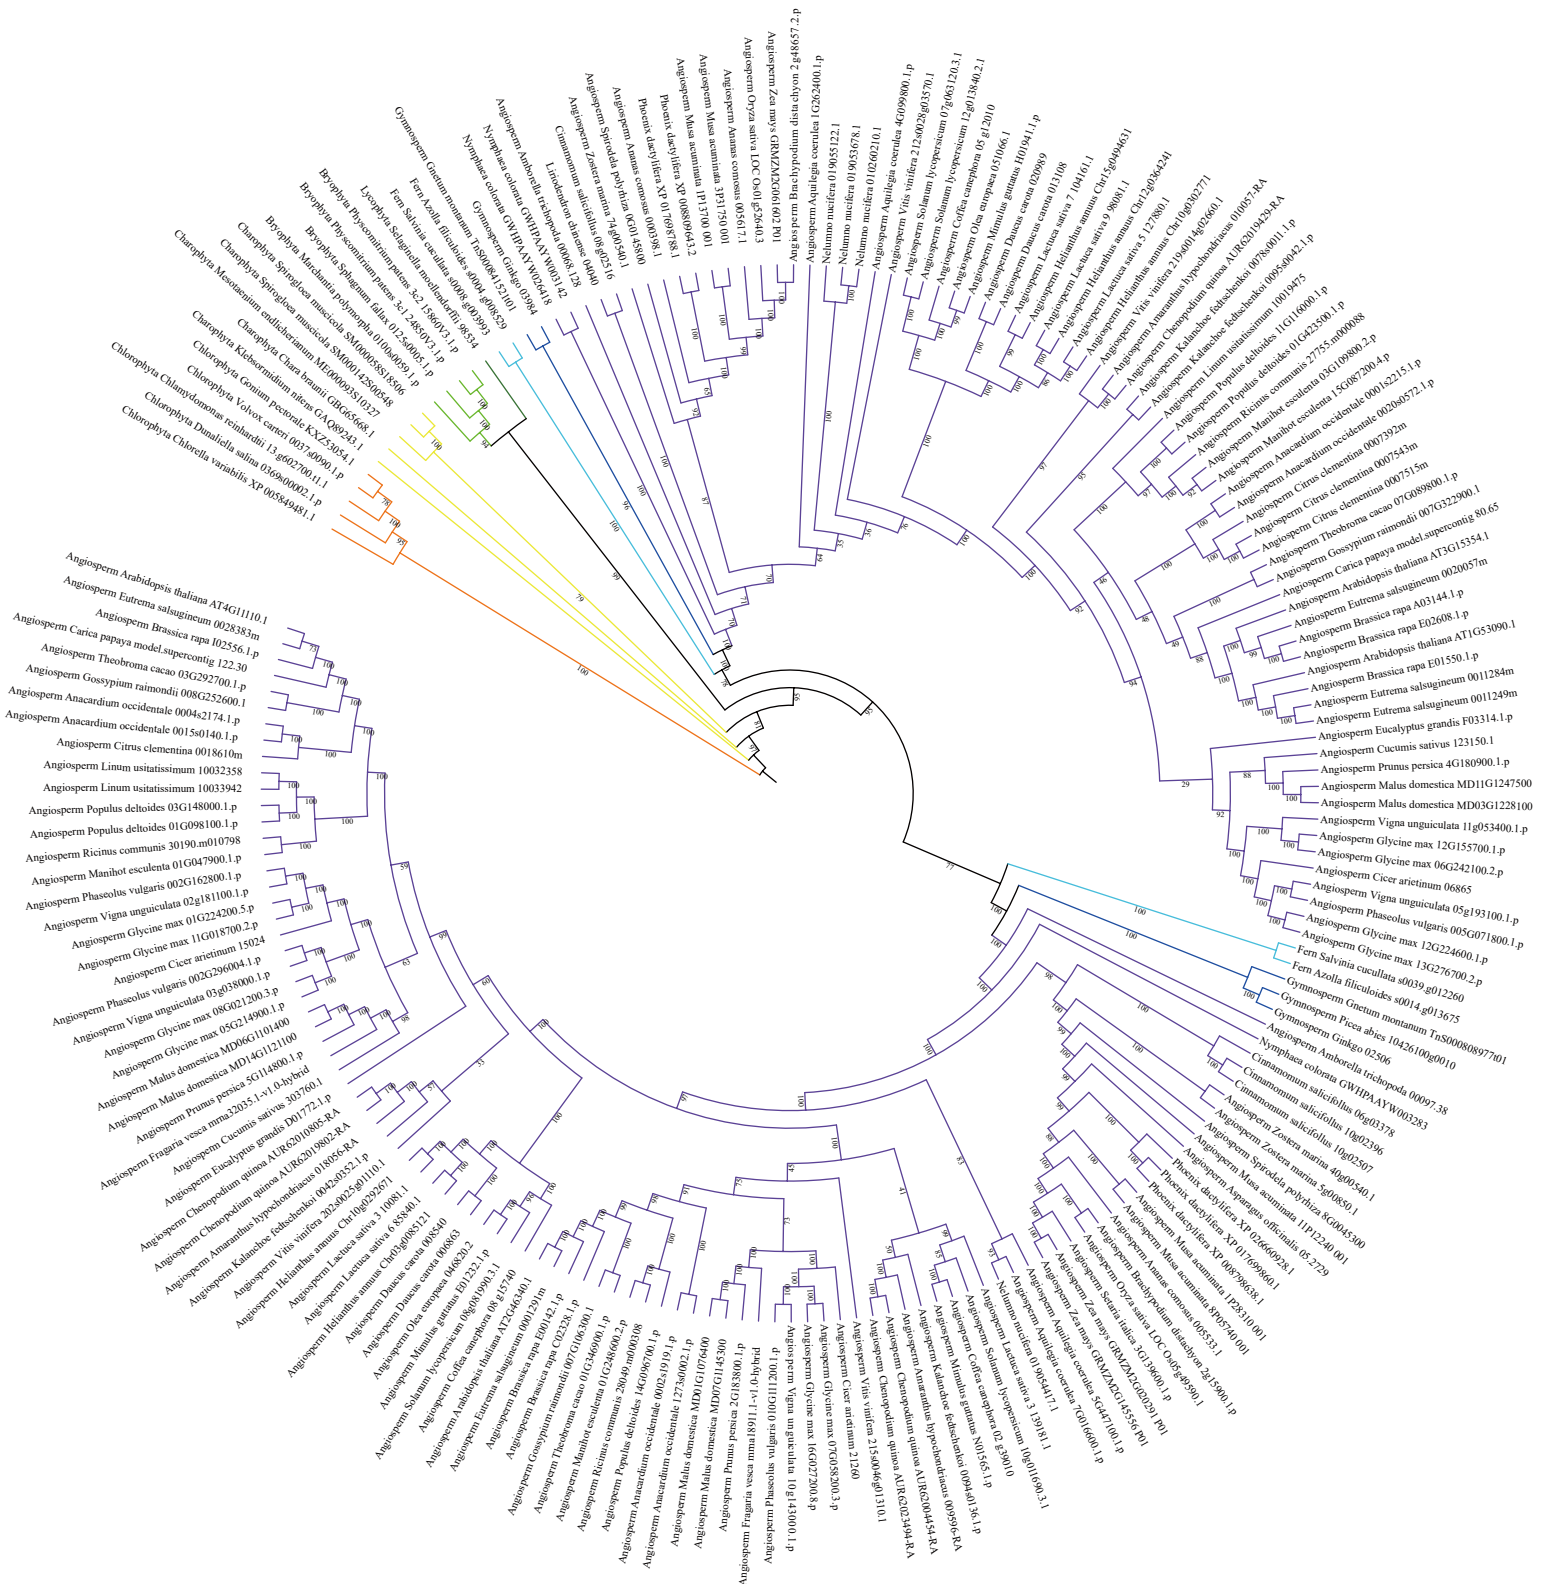

Supplemental Figure S4. Phylogenetic tree of SPA. Bootstrap values are labelled at each branch.

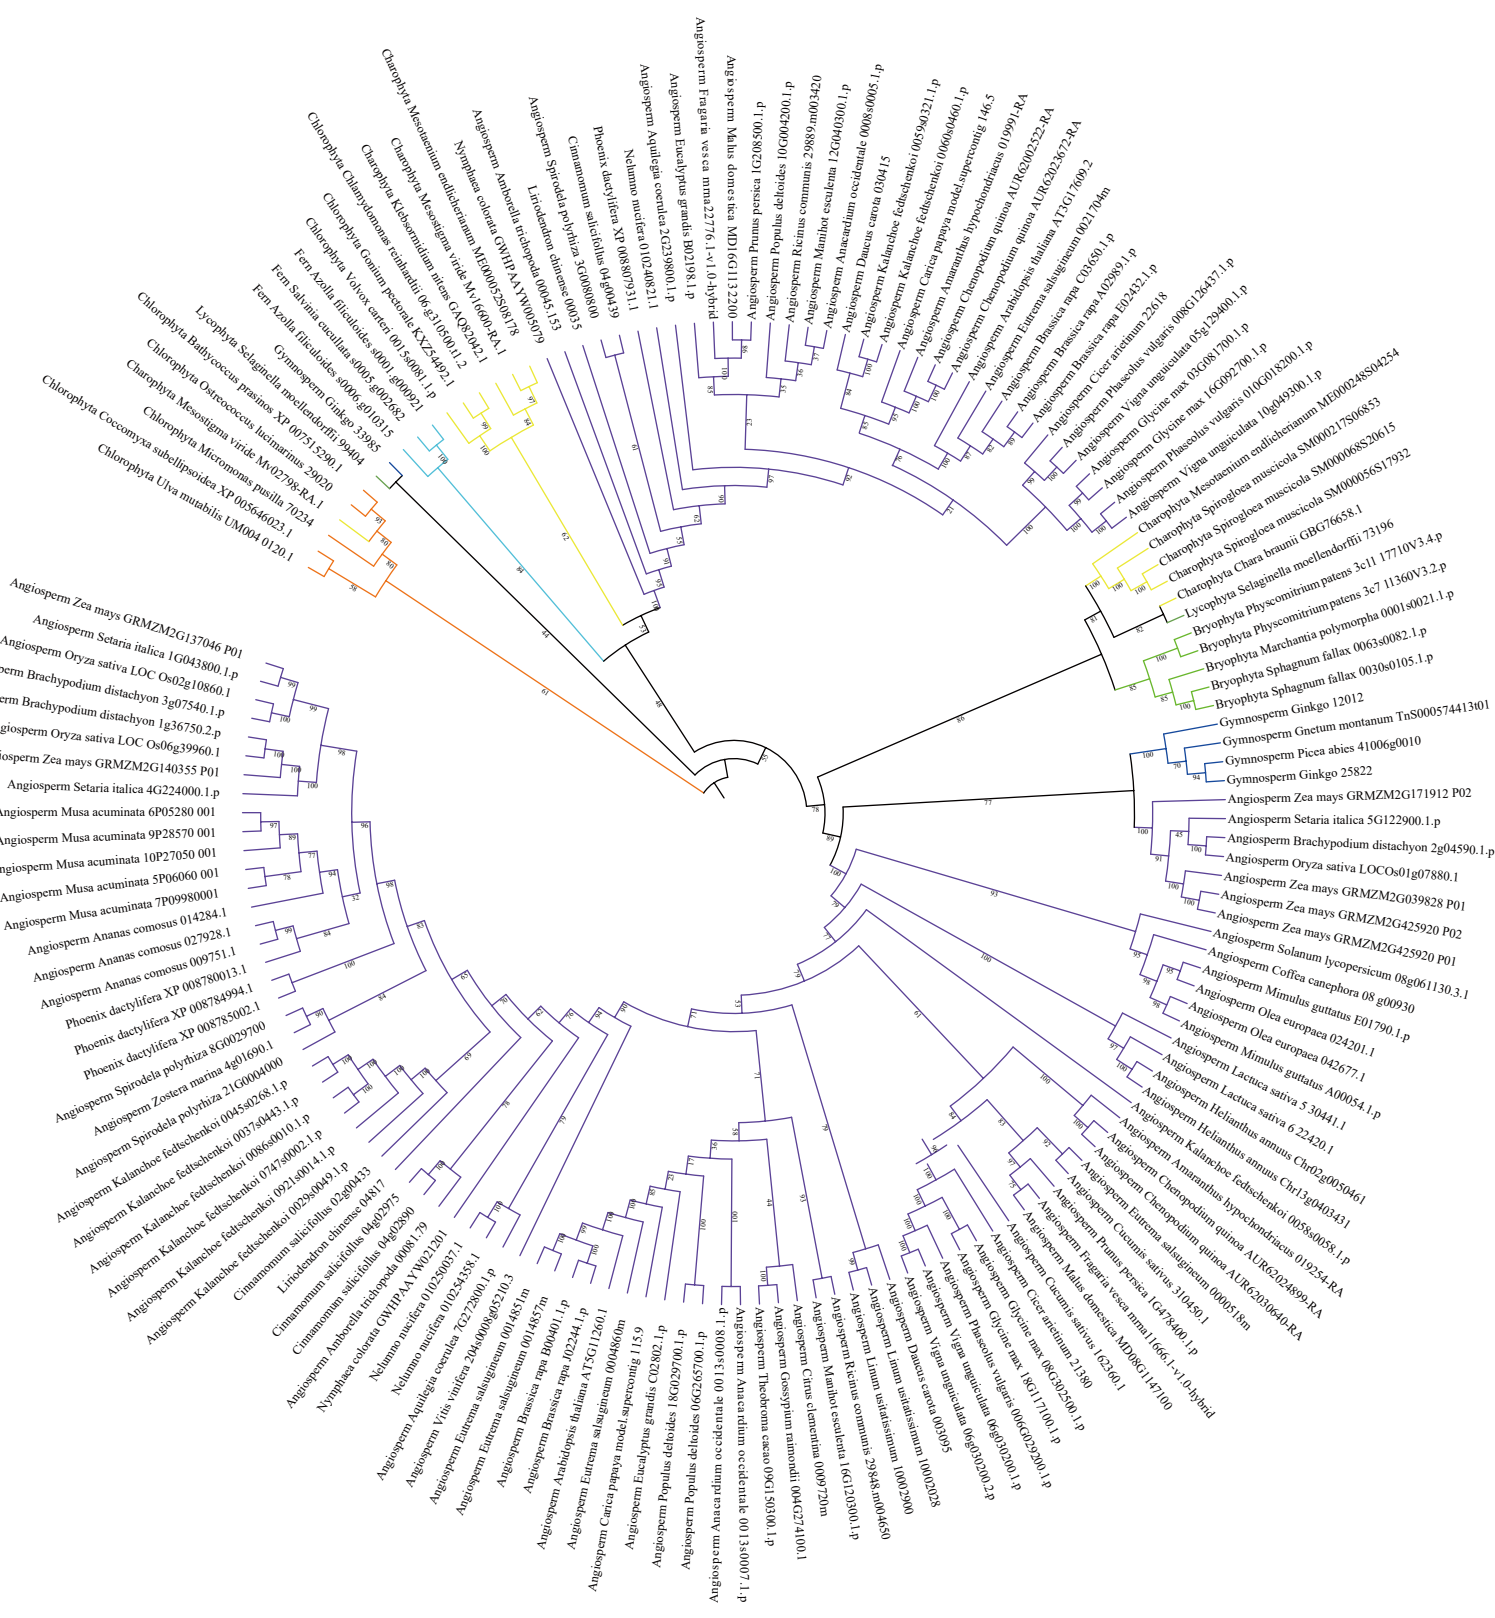

Supplemental Figure S5. Phylogenetic tree of HY5. Bootstrap values are labelled at each branch.



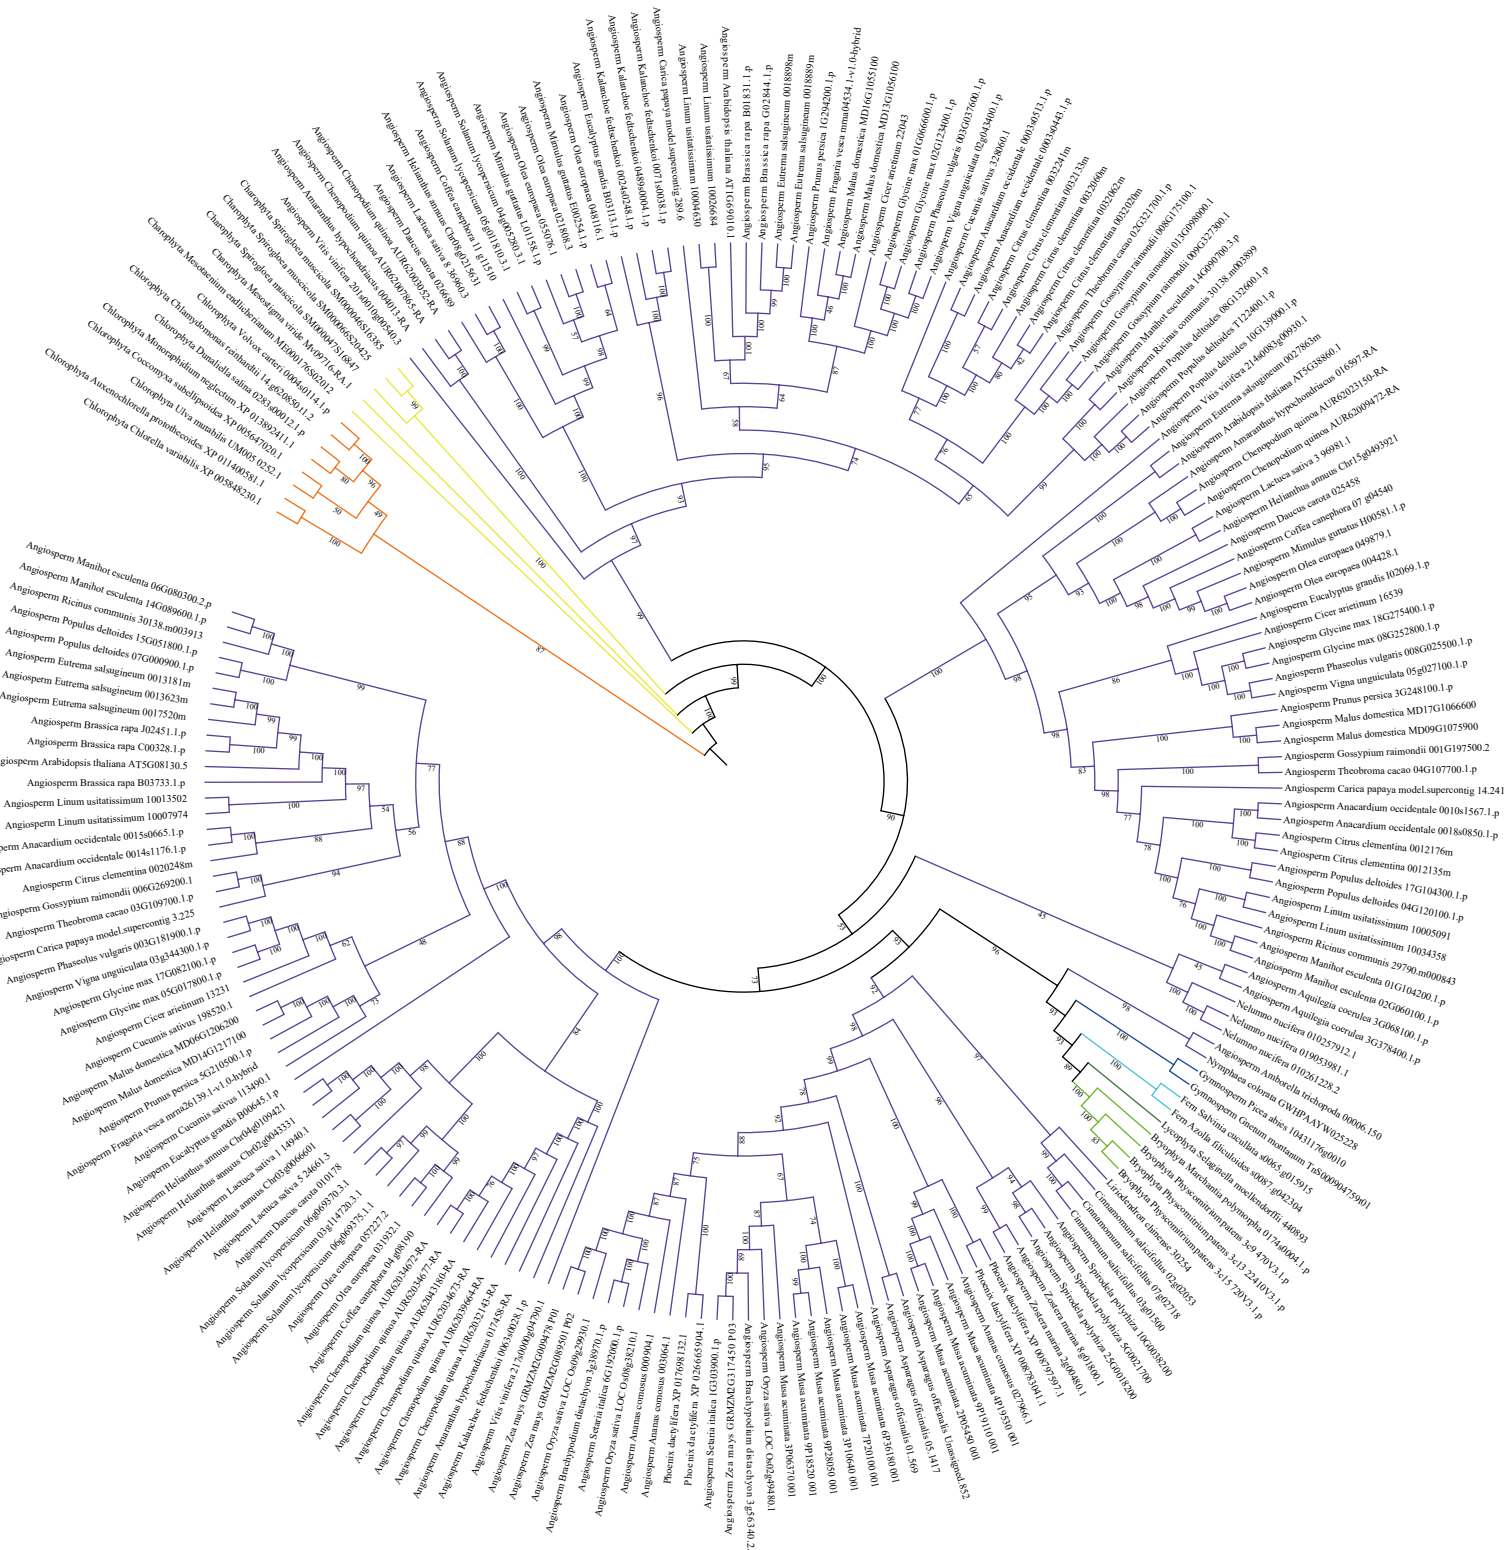

Supplemental Figure S7. Phylogenetic tree of BIM1. Bootstrap values are labelled at each branch.

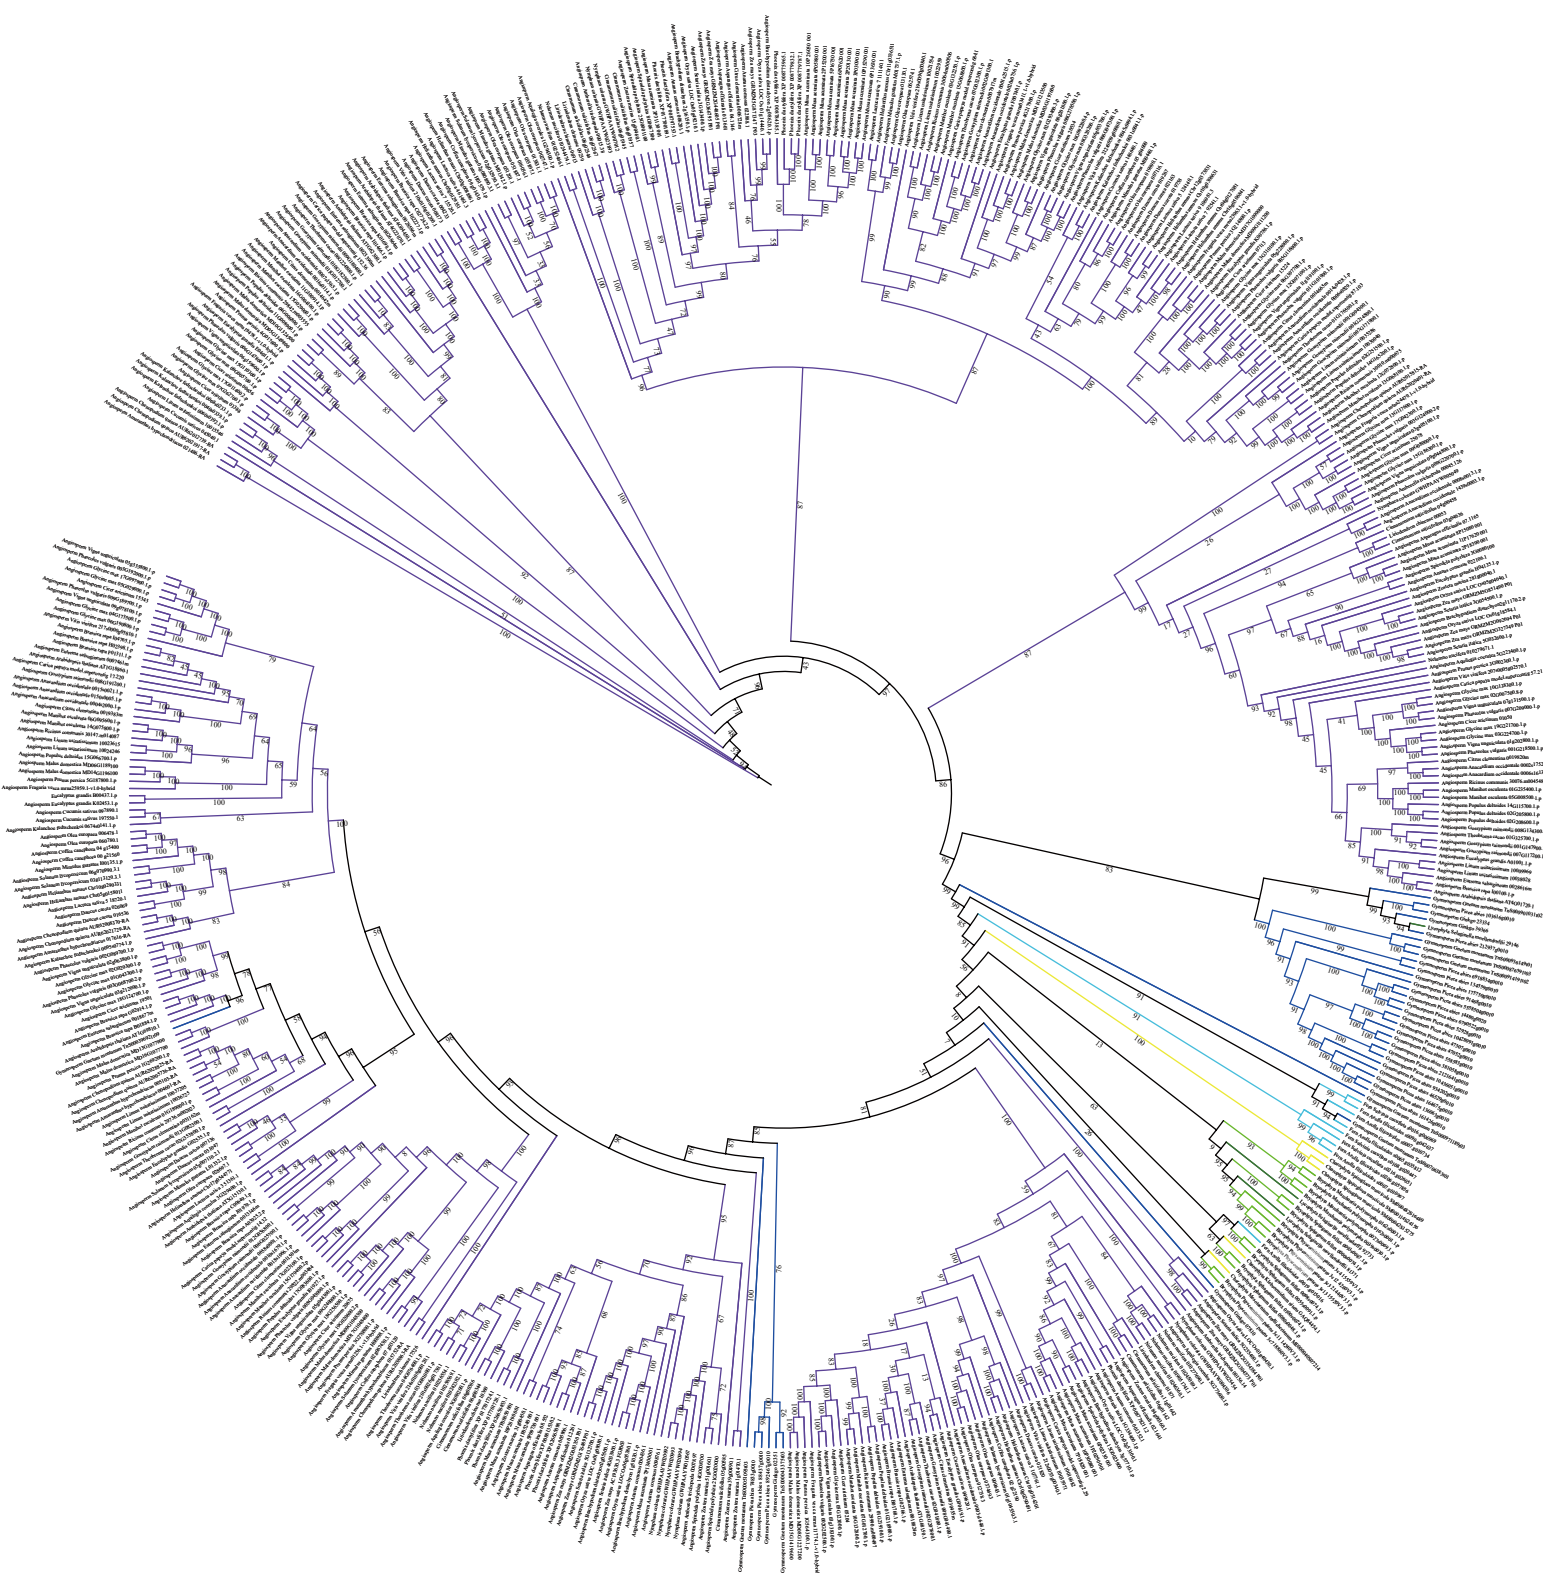

Supplemental Figure S8. Phylogenetic tree of WRKY36. Bootstrap values are labelled at each branch.

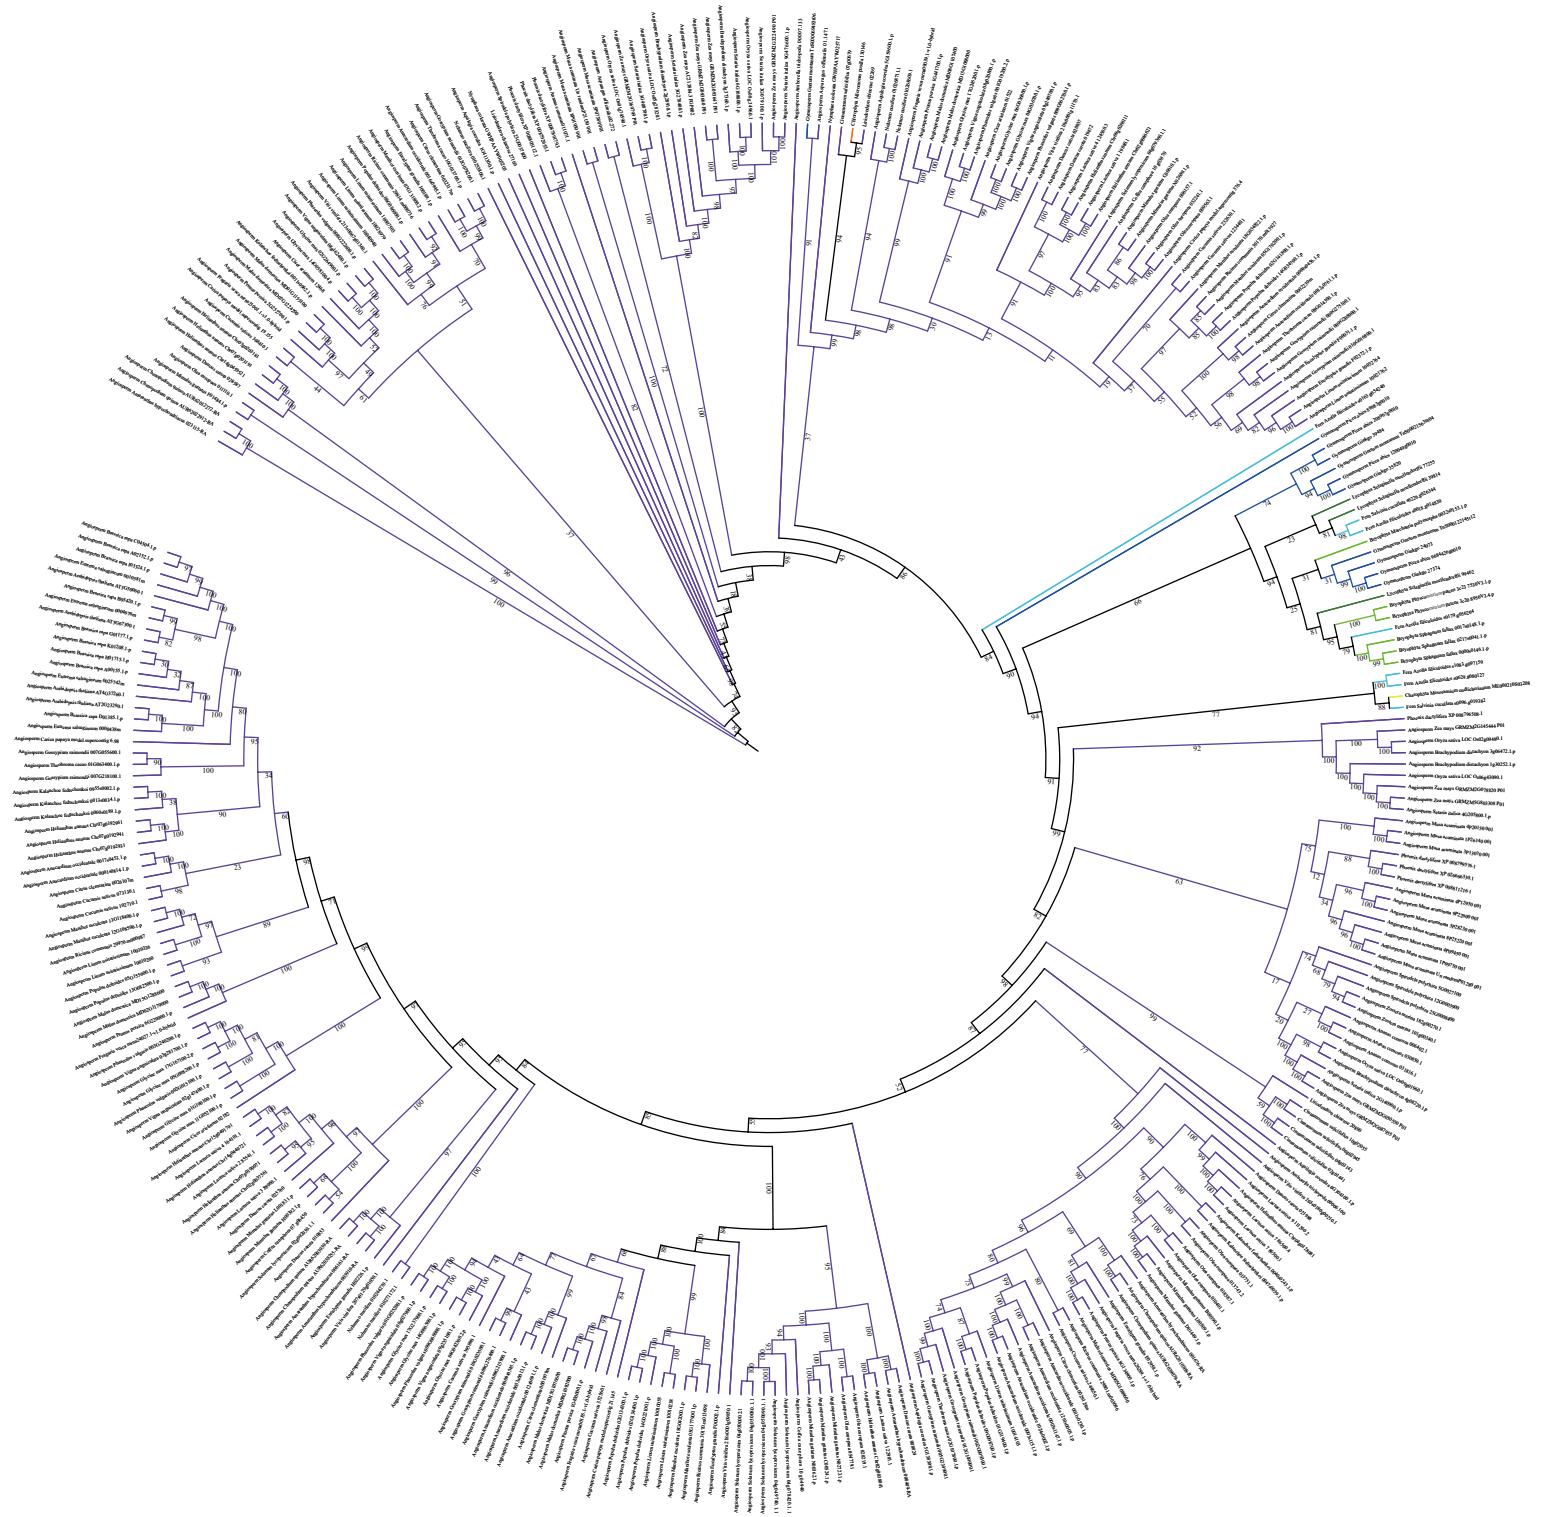

Supplemental Figure S9. Phylogenetic tree of MYB73/77. Bootstrap values are labelled at each branch.





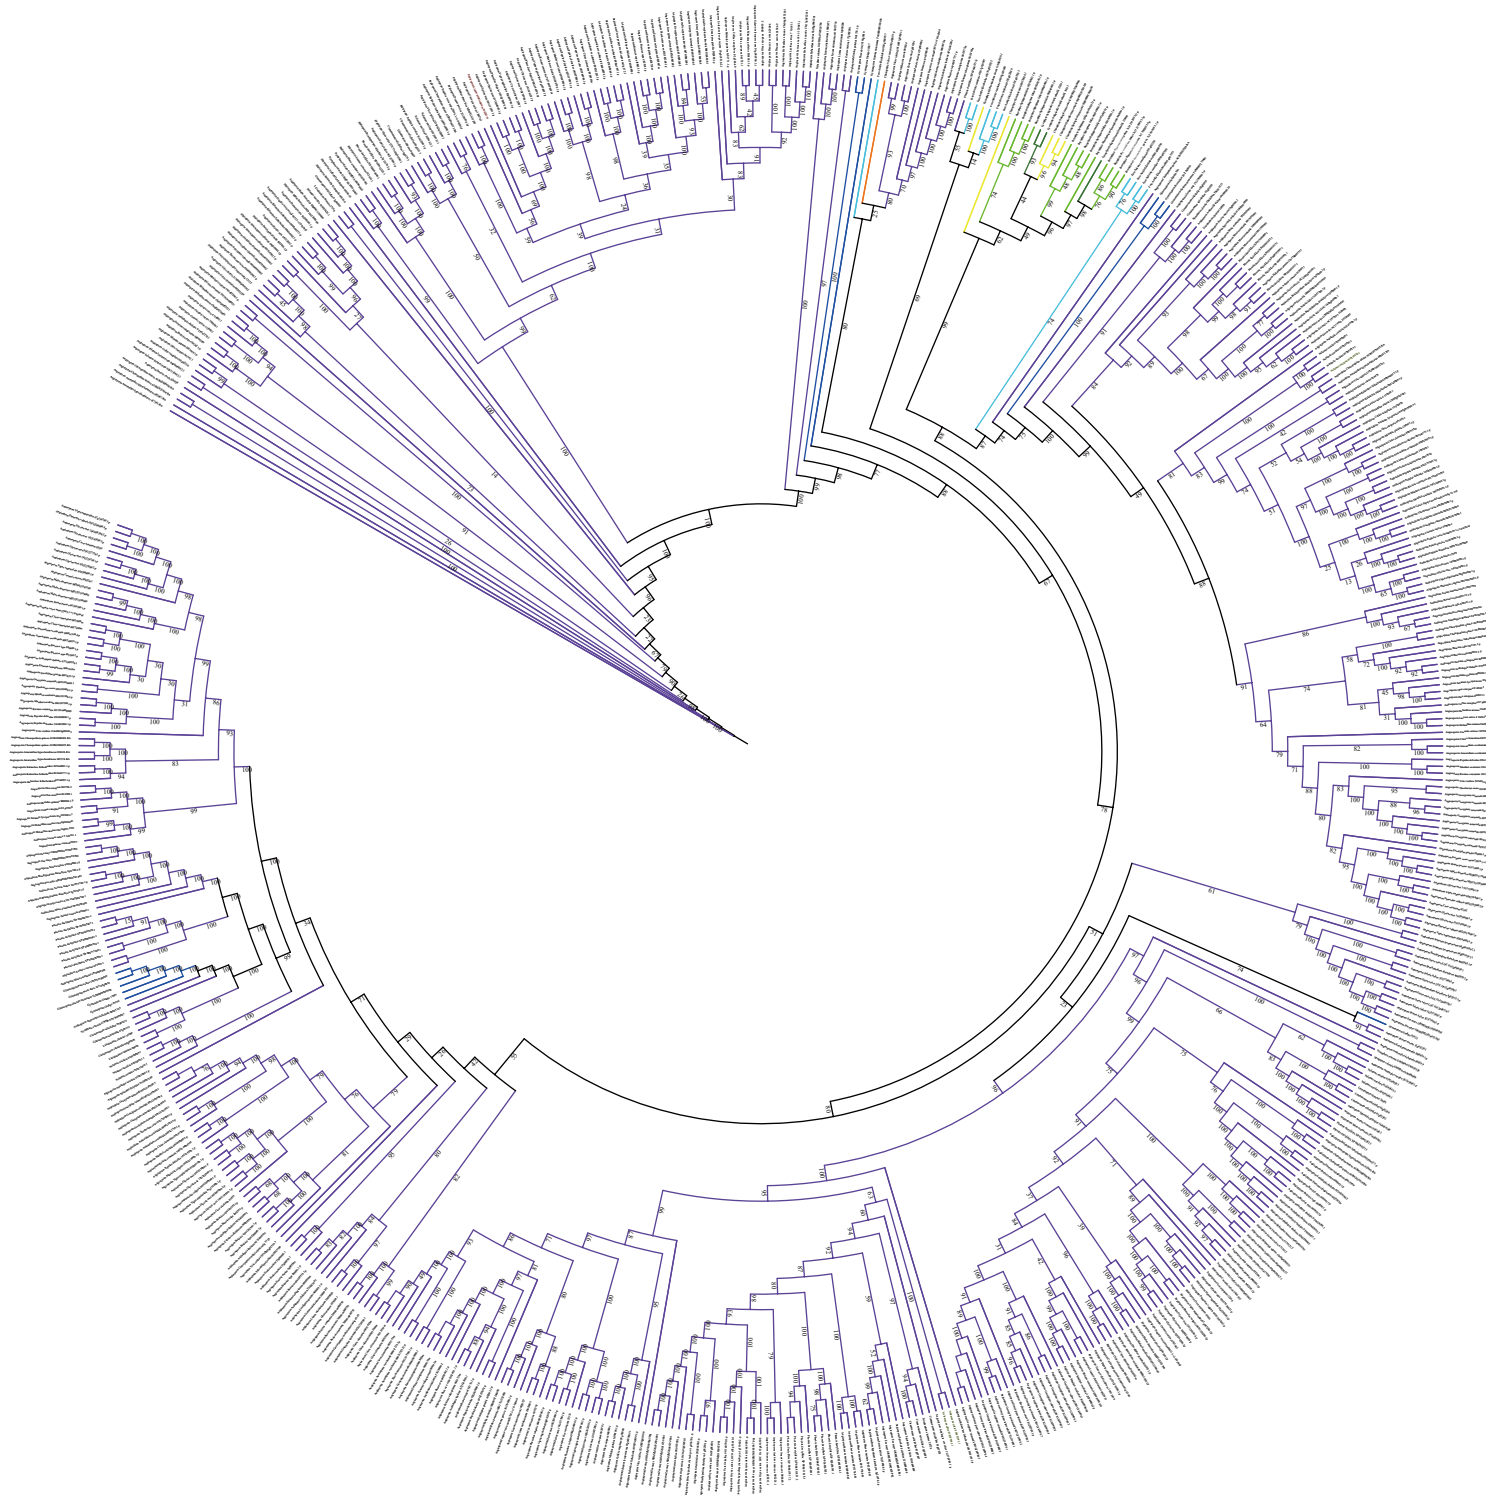

Supplemental Figure S11. Phylogenetic tree of PIFs. Bootstrap values are labelled at each branch.

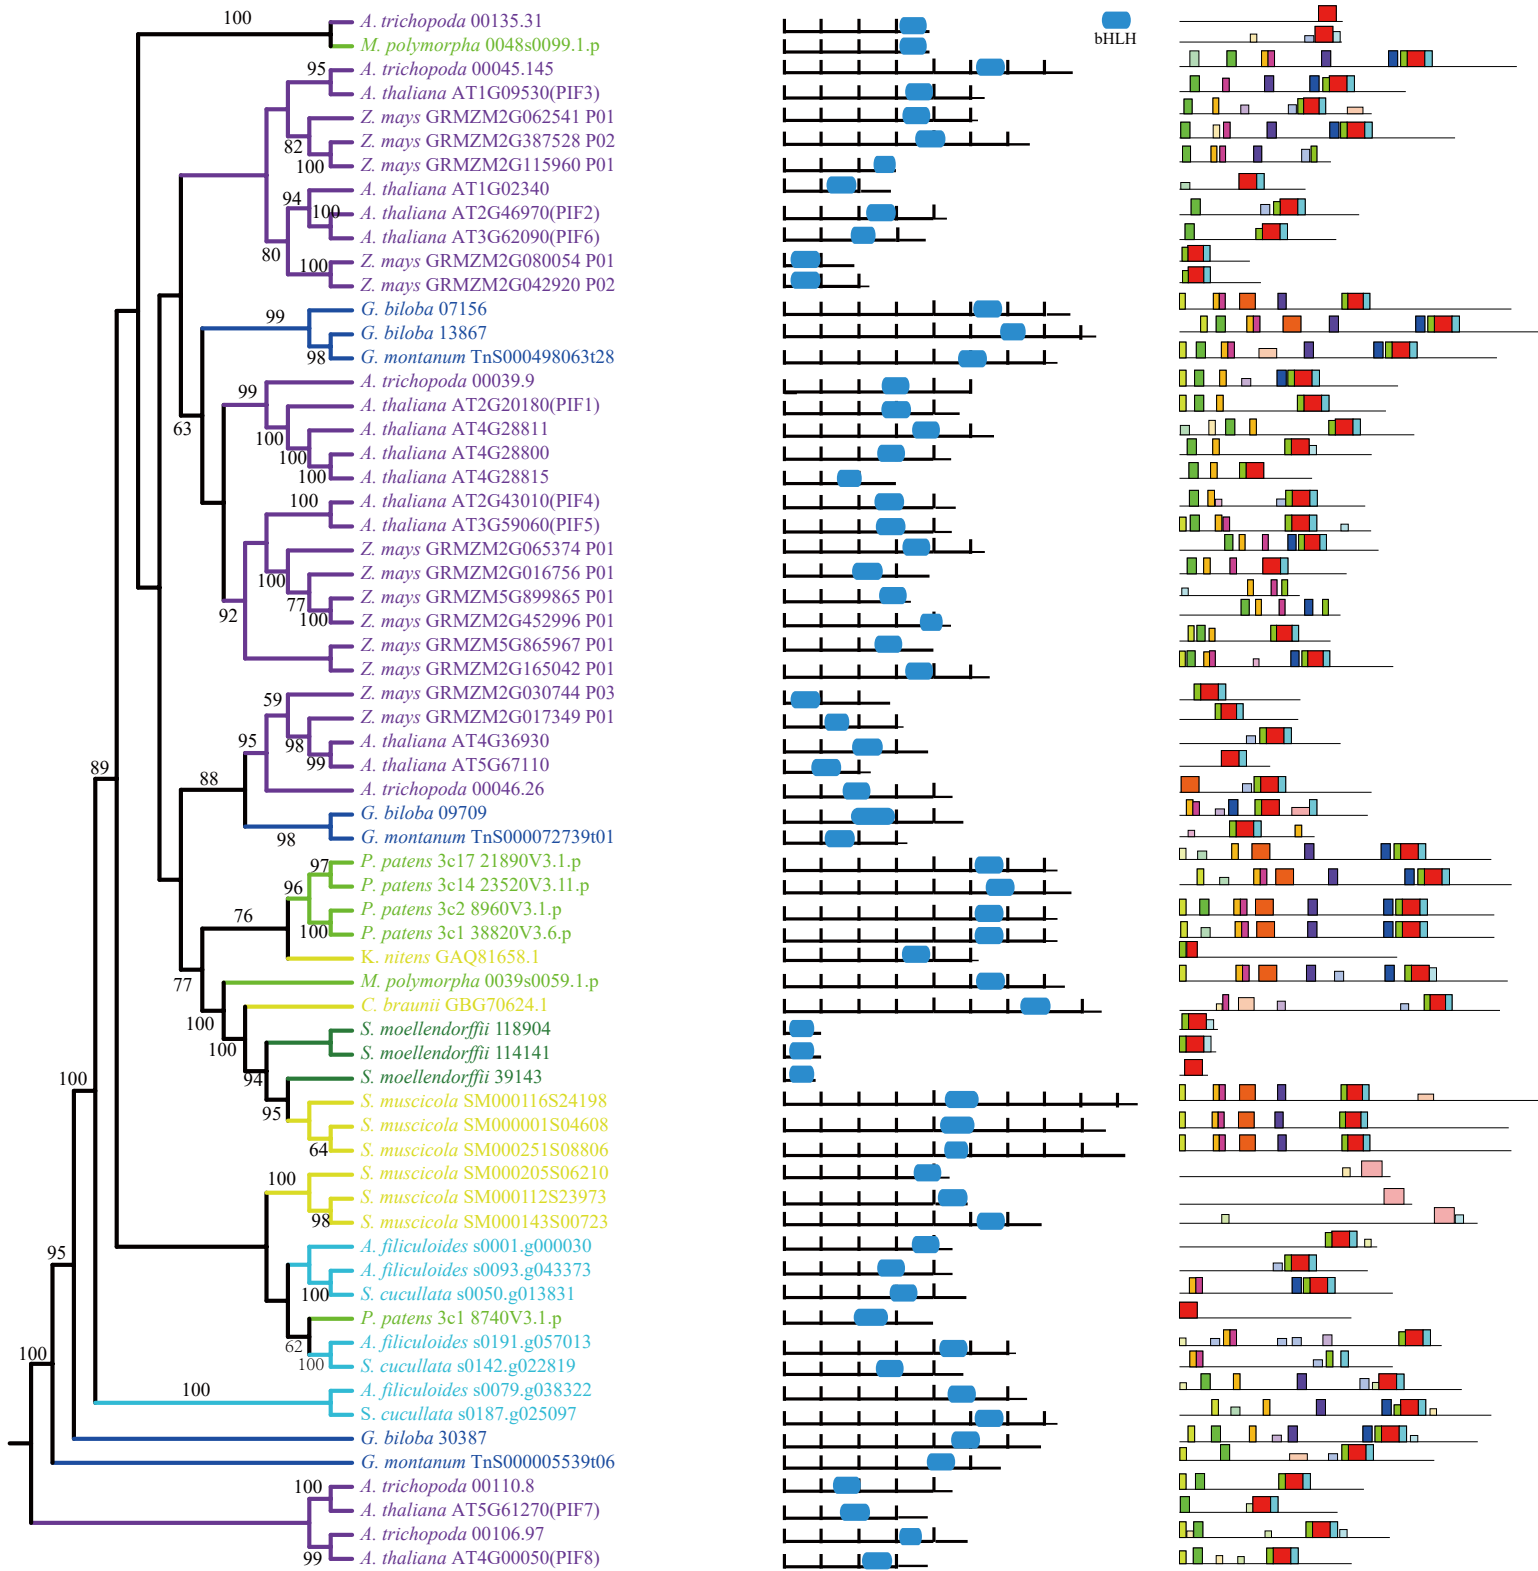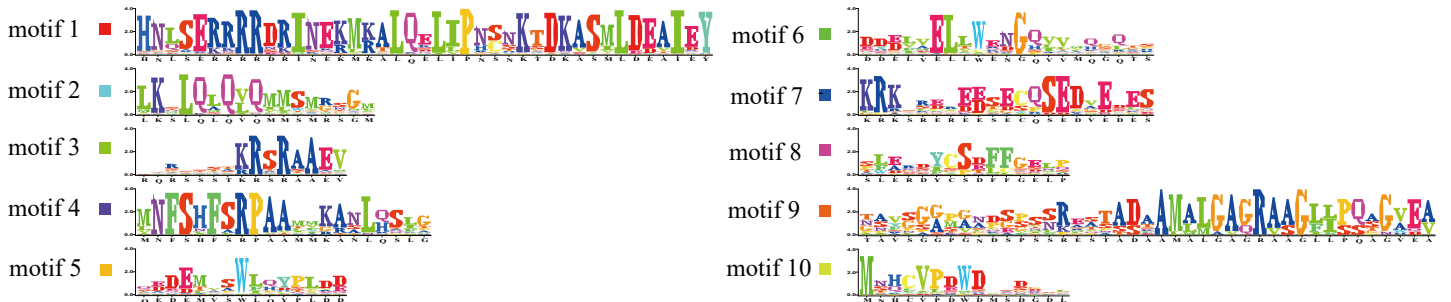

Supplemental Figure S12. Comparisons of protein domain and conserved amino acid motifs among PIFs in representative green plant genomes.
